# Supplementary material for: Familial natural short sleep mutations reduce Alzheimer pathology in mice
Source: PubMed Central journal article supplement — iScience. 2022 Mar 15;25(4):103964. doi: 10.1016/j.isci.2022.103964 (PMC9042888; doi:10.1016/j.isci.2022.103964), 2022-03-15
Supplement: mmc1.pdf [file mmc1.pdf]

iScience, Volume 25

## **Supplemental information**

### **Familial natural short sleep mutations**

#### **reduce Alzheimer pathology in mice**

**Qing Dong, Nicholas W. Gentry, Thomas McMahon, Maya Yamazaki, Lorena Benitez-Rivera, Tammy Wang, Li Gan, Louis Ptáček, and Ying-Hui Fu**

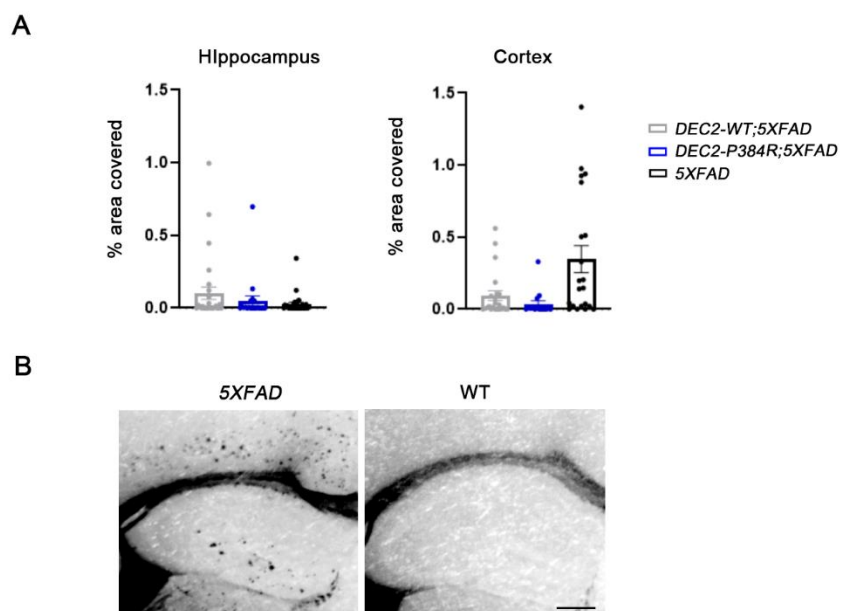

**Figure S1 Plaques in 3- and 6-month-old mouse, related to Figure 1.**

(A) % area of silver-stained brain slice from hippocampus and cortex covered by plaques in 3 months old mice. Hippocampus: *DEC2-WT;5XFAD*,  $n = 4$  ( $N = 28$  slices); *DEC2-P384R;5XFAD*,  $n = 3$  ( $N = 21$  slices); *5XFAD*,  $n = 4$  ( $N = 28$  slices); cortex: *DEC2-WT;5XFAD*,  $n = 4$  ( $N = 22$  slices); *DEC2-P384R;5XFAD*,  $n = 3$  ( $N = 15$  slices); *5XFAD*,  $n = 4$  ( $N = 21$  slices). (B) Representative silver staining of plaques for 6-month-old hippocampus in *5XFAD* and WT mice at high magnification. Scale bars, 500  $\mu\text{m}$ . Data expressed as mean  $\pm$  SEM with individual measures displayed.

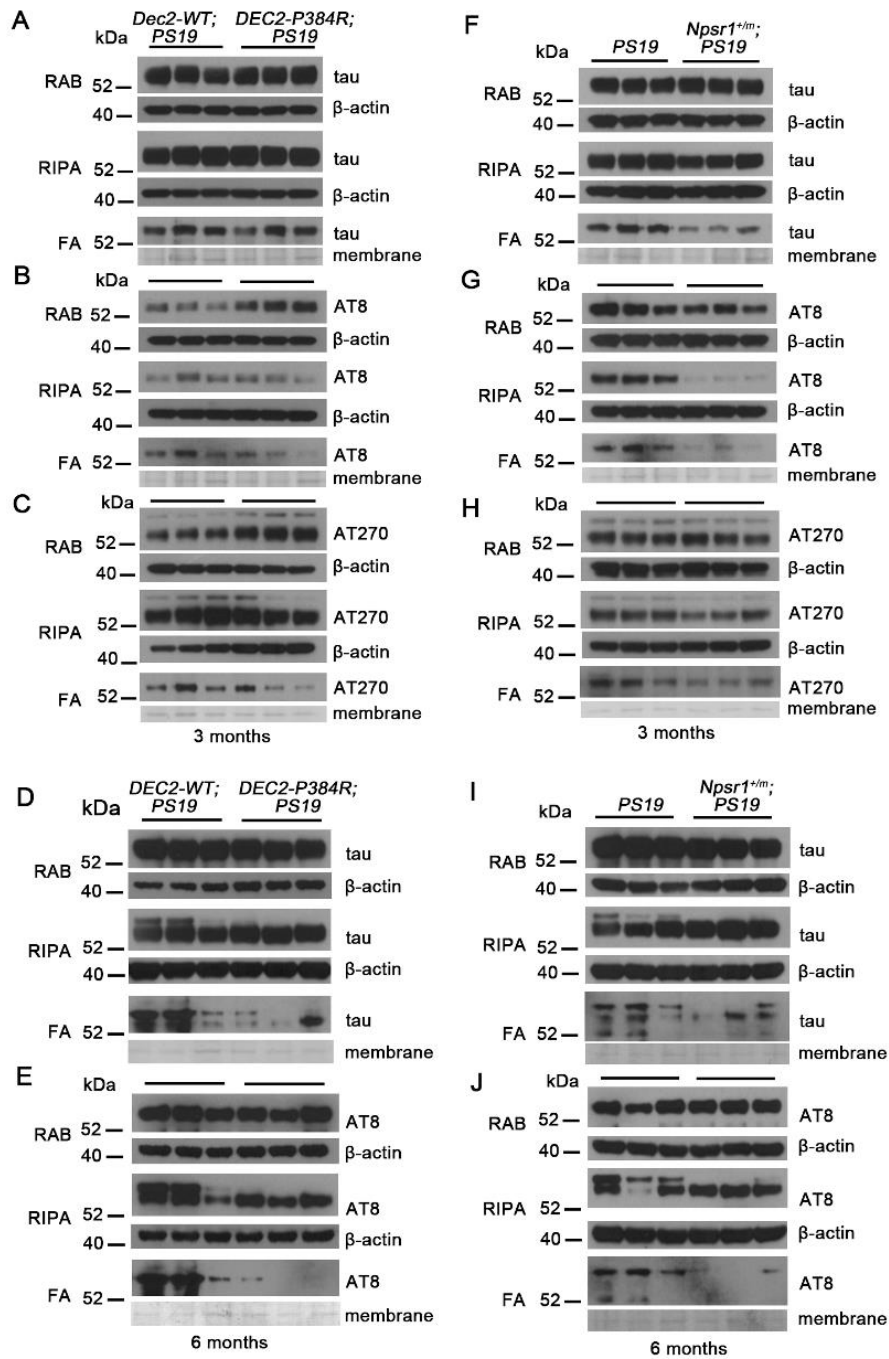

**Figure S2 Representative Western blot for tau protein in *FNSS;PS19* mice, related to Figure 2.**

(A-J) Representative Western blot analysis of the hippocampus of three-month-old and six-month-old mice for total tau or phosphorylated tau in soluble (RAB), less soluble (RIPA) and insoluble (FA) fractions, respectively.  $\beta$ -actin served as loading control for RAB and RIPA fractions. Membranes stained with Coomassie brilliant blue (CBB) served as loading control for FA fractions.

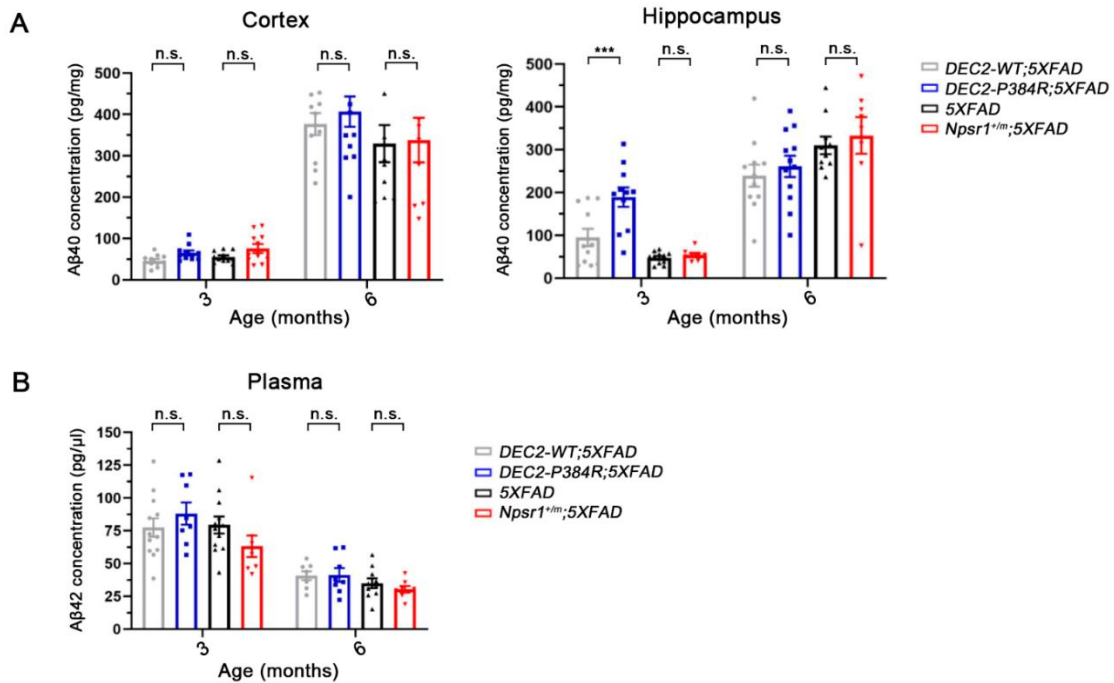

**Figure S3** A $\beta$ 40 and A $\beta$ 42 from *FNSS:5XFAD* measured by ELISA, related to **Figure 3**.

(A) Soluble A $\beta$ 40 from mouse cortex (left) of indicated genotypes measured by ELISA at 3 months of age ( $n = 11$  mice per group) and 6 months of age (*DEC2-WT;5XFAD*,  $n = 11$ ; *DEC2-P384R;5XFAD*,  $n = 12$ ; *5XFAD*,  $n = 10$ ; *Npsr1<sup>+/-</sup>;5XFAD*,  $n = 9$ ); soluble A $\beta$ 40 from hippocampus (right) at 3 months of age (*DEC2-WT;5XFAD*,  $n = 11$ ; *DEC2-P384R;5XFAD*,  $n = 11$ ; *5XFAD*,  $n = 12$ ; *Npsr1<sup>+/-</sup>;5XFAD*,  $n = 8$ ) and 6 months of age (*DEC2-WT;5XFAD*,  $n = 11$ ; *DEC2-P384R;5XFAD*,  $n = 12$ ; *5XFAD*,  $n = 10$ ; *Npsr1<sup>+/-</sup>;5XFAD*,  $n = 8$ ). (B) Plasma A $\beta$ 42 from indicated genotypes measured by ELISA at 3 months of age (*DEC2-WT;5XFAD*,  $n = 12$ ; *DEC2-P384R;5XFAD*,  $n = 8$ ; *5XFAD*,  $n = 12$ ; *Npsr1<sup>+/-</sup>;5XFAD*,  $n = 8$ ) and 6 months of age (*DEC2-WT;5XFAD*,  $n = 8$ ; *DEC2-P384R;5XFAD*,  $n = 8$ ; *5XFAD*,  $n = 10$ ; *Npsr1<sup>+/-</sup>;5XFAD*,  $n = 8$ ). Data expressed as mean  $\pm$  SEM with individual measures displayed. Statistical analysis performed through one-way ANOVA with post-hoc Tukey's multiple comparisons test between relevant conditions. \*\*\* $p < 0.001$ ; n.s., not significant.

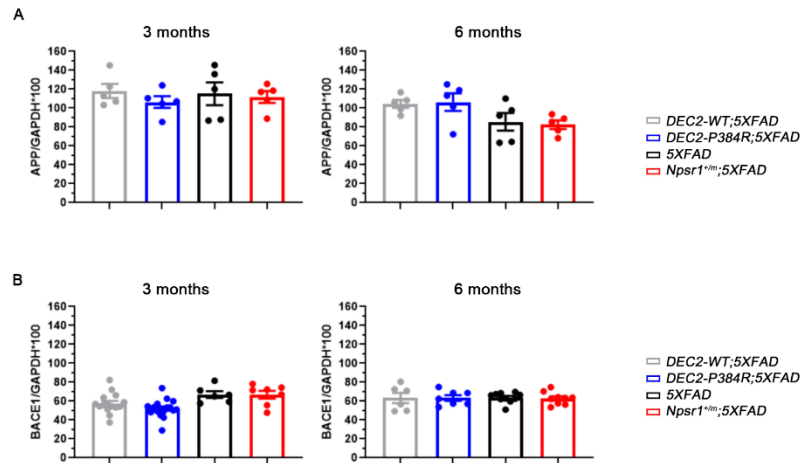

**Figure S4 Quantitative results from Western blots for APP and BACE1, related to Figure 3.**

(A) APP levels at 3 and 6 months of age ( $n = 5$  mice per group). (B) BACE1 levels at 3 months of age (*DEC2-WT*;5XFAD,  $n = 15$ ; *DEC2-P384R*;5XFAD,  $n = 17$ ; 5XFAD,  $n = 6$ ; *Npsr1*<sup>+/*m*</sup>;5XFAD,  $n = 7$ ) and 6 months of age (*DEC2-WT*;5XFAD,  $n = 6$ ; *DEC2-P384R*;5XFAD,  $n = 7$ ; 5XFAD,  $n = 10$ ; *Npsr1*<sup>+/*m*</sup>;5XFAD,  $n = 10$ ). Data expressed as mean  $\pm$  SEM with individual measures displayed.

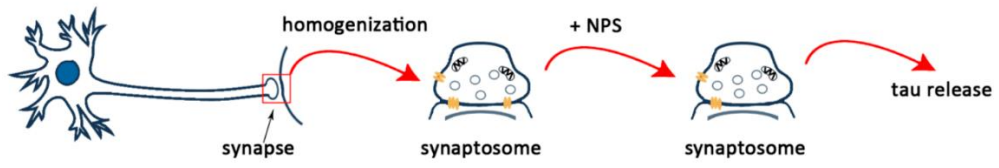

**Figure S5 Schematic for synaptosome preparation and treatment with NPS, related to Figure 4.**
